# Supplementary material for: Network-based machine learning and graph theory algorithms for precision oncology
Source: PubMed Central journal article supplement (PMC5871915; doi:10.1038/s41698-017-0029-7), 2017-08-08
Supplement: 41698_2017_29_MOESM1_ESM.pdf [file 41698_2017_29_MOESM1_ESM.pdf]

# **Network-based Machine Learning and Graph Theory Algorithms for Precision Oncology**

Wei Zhang<sup>1</sup>, Jeremy Chien<sup>2</sup>, Jeongsik Yong<sup>3</sup> and Rui Kuang<sup>1</sup>

<sup>1</sup>*Department of Computer Science and Engineering, University of Minnesota Twin Cities, Minneapolis, Minnesota, United States of America*

<sup>2</sup>*Department of Cancer Biology, University of Kansas Medical Center, Kansas City, Kansas, United States of America*

<sup>3</sup>*Department of Biochemistry, Molecular Biology and Biophysics, University of Minnesota Twin Cities, Minneapolis, Minnesota, United States of America*

Table S1: Glossary

| Terms                               | Description                                                                                                                              |
|-------------------------------------|------------------------------------------------------------------------------------------------------------------------------------------|
| <b>directed graph</b>               | all the edges are directed from one vertex to another in a directed graph                                                                |
| <b>bipartite graph</b>              | edges in a bipartite graph only connect nodes in two disjoint sets                                                                       |
| <b>hypergraph</b>                   | a graph which edges are sets of any number of vertices                                                                                   |
| <b>directed acyclic graph</b>       | a directed graph with no directed cycle                                                                                                  |
| <b>factor graph</b>                 | a bipartite graph representing the factorization of a function with two types of nodes (variables and factors)                           |
| <b>regularization</b>               | introduction of an additional term to an objective/loss function of a statistical model for better generalization to new data            |
| <b>spectral graph theory</b>        | the study of the characteristics of the adjacency matrix or the Laplacian matrix associated with the graph                               |
| <b>supervised learning/approach</b> | a type of machine learning algorithm that build a model from labeled training data to make predictions on the unlabeled test data        |
| <b>semi-supervised learning</b>     | make use of both labeled and unlabeled data for training a machine learning model                                                        |
| <b>LASSO</b>                        | Least Absolute Shrinkage and Selection Operator; a regularization technique that performs sparse variable selection                      |
| <b>elastic-net</b>                  | a regularization technique that linearly combines the LASSO and ridge penalties                                                          |
| <b>logistic regression</b>          | a linear classification model using logistic output                                                                                      |
| <b>Support Vector Machine (SVM)</b> | a large-margin based classifier that finds an optimal hyperplane to separate two classes                                                 |
| <b>bi-clustering</b>                | a data mining technique which simultaneously clustering the rows and columns of a matrix                                                 |
| <b>label propagation</b>            | a semi-supervised learning algorithm for label inference based on a graph structure                                                      |
| <b>Steiner tree problem</b>         | find the minimum weight tree spanning through all the vertices in given subset in a graph                                                |
| <b>heuristic algorithm</b>          | a technique designed to find an approximate solution close to the optimal one more quickly than the methods finding the optimal solution |
| <b>random walk</b>                  | a stochastic process describing a path of a succession of random steps on a graph                                                        |
| <b>cross-validation</b>             | estimate the performance of a predictive model by testing on a holdout labeled data set in addition to training and test data            |
| <b>matrix completion</b>            | the task of filling the missing entries in a matrix based on some error measures                                                         |
| <b>kernel function</b>              | a positive semi-definite function to compute the pairwise similarity between two feature vectors                                         |
| <b>diffusion kernel</b>             | a special class of exponential kernels on graphs                                                                                         |
| <b>network diffusion</b>            | calculate an overall network proximity by simulating the diffusion of a value throughout a network                                       |
| <b>kernel regression</b>            | a regression method based on kernel functions to allow non-linear relation between the random variables                                  |
| <b>hierarchical clustering</b>      | a clustering method to build a hierarchy of clusters of the samples                                                                      |

Table S2: Network-based Machine Learning Models.

| Base Model                          | Objective function                                                                                                                                                                                                                                                                                         | Definitions                                                                                                                                                                                                                                                                                         |
|-------------------------------------|------------------------------------------------------------------------------------------------------------------------------------------------------------------------------------------------------------------------------------------------------------------------------------------------------------|-----------------------------------------------------------------------------------------------------------------------------------------------------------------------------------------------------------------------------------------------------------------------------------------------------|
| Linear regression [34]              | $\mathcal{L}(\beta \lambda_1, \lambda_2) = \ \mathbf{y} - \mathbf{X}^T\beta\ ^2 + \lambda_1 \beta _1 + \lambda_2\beta^T \mathbf{L}\beta$                                                                                                                                                                   |                                                                                                                                                                                                                                                                                                     |
| Cox regression [36]                 | $\mathcal{L}(\beta, h_0 \lambda_1, \lambda_2) = \sum_{i=1}^n \{-\exp(\mathbf{x}_i^T \beta) H_0(t_i) + \delta_i [\log(h_0(t_i)) + \mathbf{x}_i^T \beta]\}$<br>$-(\lambda_1\beta^T \beta + \lambda_2\beta^T \mathbf{L}\beta)$                                                                                | $t_i$ : observed or censored survival time for the $i^{th}$ patient. $h_0(t)$ : baseline hazard function.<br>$H_0(t_i) = \sum_{t_k \leq t_i} h_0(t_k)$ . $\delta_i$ : indicator of the survival time $t_i$ is observed or censored.                                                                 |
| Logistic regression [37]            | $\mathcal{L}(\beta, \beta_0 \lambda_1, \lambda_2) = \sum_{i=1}^n \{y_i \log p(\mathbf{x}_i) + (1 - y_i) \log(1 - p(\mathbf{x}_i))\}$<br>$-(\lambda_1 \beta _1 + \lambda_2\beta^T \mathbf{L}\beta)$                                                                                                         | $\mathbf{y} = (y_1, \dots, y_n)^T$ with $y_i \in \{1, 0\}$ . $\beta_0$ : intercept.<br>$p(\mathbf{x}_i)$ : the probability that the $i^{th}$ sample is in class 1.                                                                                                                                  |
| Support vector machine [38]         | $\mathcal{L}(\beta, \beta_0 \lambda_1, \lambda_2) = \sum_{i=1}^n [1 - y_i(\beta_0 + \mathbf{x}_i^T \beta)]_+ + \lambda_1\beta^T \beta + \lambda_2\beta^T \mathbf{L}\beta$                                                                                                                                  | “+”: the positive part, i.e., $z_+ = \max\{z, 0\}$ . $\mathbf{y} = (y_1, \dots, y_n)^T$ with $y_i \in \{1, 0\}$ .                                                                                                                                                                                   |
| Bipartite-graph-based learning [40] | $\mathcal{L}(\mathbf{f}, \beta \lambda) = \ \mathbf{f}\ ^2 + \ \beta\ ^2 + 2\mathbf{f}^T \mathbf{S}\beta + \lambda\ \mathbf{f} - \mathbf{f}^{(0)}\ ^2$                                                                                                                                                     | $\mathbf{X}^+$ : non-negative adjacency matrix of the bipartite graph representation of $\mathbf{X}$ (40).<br>Bipartite graph: $\mathbf{S} = \mathbf{D}_c^{-\frac{1}{2}} \mathbf{X} + \mathbf{D}_r^{-\frac{1}{2}}$ , where $\mathbf{c}$ and $\mathbf{r}$ are column and row sum of $\mathbf{X}^+$ . |
| Hypergraph-based learning [39,41]   | $\mathcal{L}(\mathbf{f}, \beta \lambda_1, \lambda_2) = \mathbf{f}^T (\mathbf{I} - \mathbf{D}_v^{-\frac{1}{2}} \mathbf{H} \mathbf{D}_\beta \mathbf{D}_e^{-1} \mathbf{H}^T \mathbf{D}_v^{-\frac{1}{2}}) \mathbf{f}$<br>$+ \lambda_1 \ \mathbf{f} - \mathbf{f}^{(0)}\ ^2 + \lambda_2 \beta^T \mathbf{L}\beta$ | $\mathbf{H}$ : hyper-graph adjacency matrix constructed from $\mathbf{X}$ ([39,41]).<br>$\mathbf{v}$ and $\mathbf{e}$ are column (vertex) sum and row (hyperedge) sum of $\mathbf{H}$ .                                                                                                             |
| NMF [42,43]                         | $\mathcal{L}(\mathbf{U}, \mathbf{H} \lambda) = \ \mathbf{X} - \mathbf{U}\mathbf{H}^T\ ^2 + \lambda \text{Tr}(\mathbf{U}^T \mathbf{L}\mathbf{U})$                                                                                                                                                           | Nonnegative matrices $\mathbf{U} = [u_{ik}] \in \mathbb{R}^{m \times k}$ and $\mathbf{H} = [h_{jk}] \in \mathbb{R}^{n \times k}$ .                                                                                                                                                                  |
| Label Propagation (LP) [62]         | $\mathcal{L}(\beta \lambda) = \ \beta - \beta^0\ ^2 + \lambda \beta^T \mathbf{L}\beta$                                                                                                                                                                                                                     | $\beta^0$ : initial coefficients.                                                                                                                                                                                                                                                                   |
